# Supplementary material
Source: publisher site journal article supplement (https://www.dovepress.com/article/367975)
Supplement: Supplementary file 1 [file get_supplementary_file.php]

**Supplementary Materials**


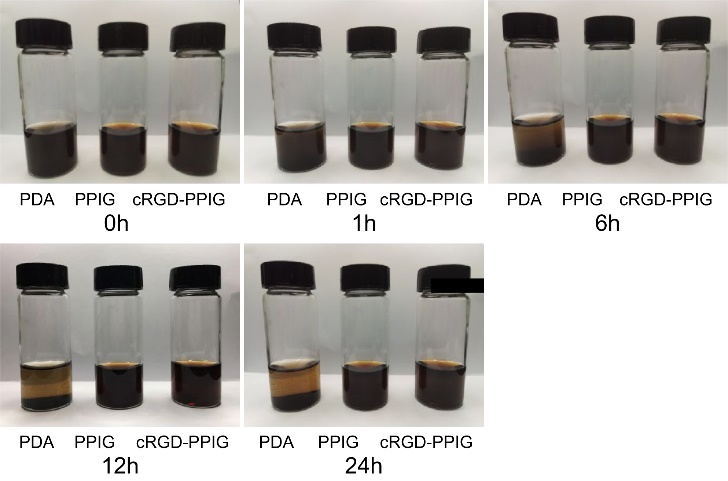


**Supplementary Figure S1**. Dispersion stability of PDA NPs, PPIG NPs, and cRGD-PPIG NPs in PBS at different time points


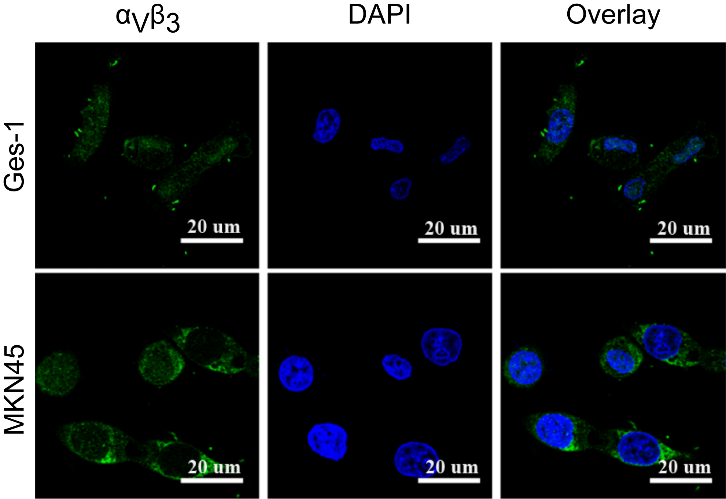


**Supplementary Figure S2**. Expression of integrin alpha V beta 3 (αvβ3) in GES-1 and MKN45 cells using confocal laser scanning microscopy


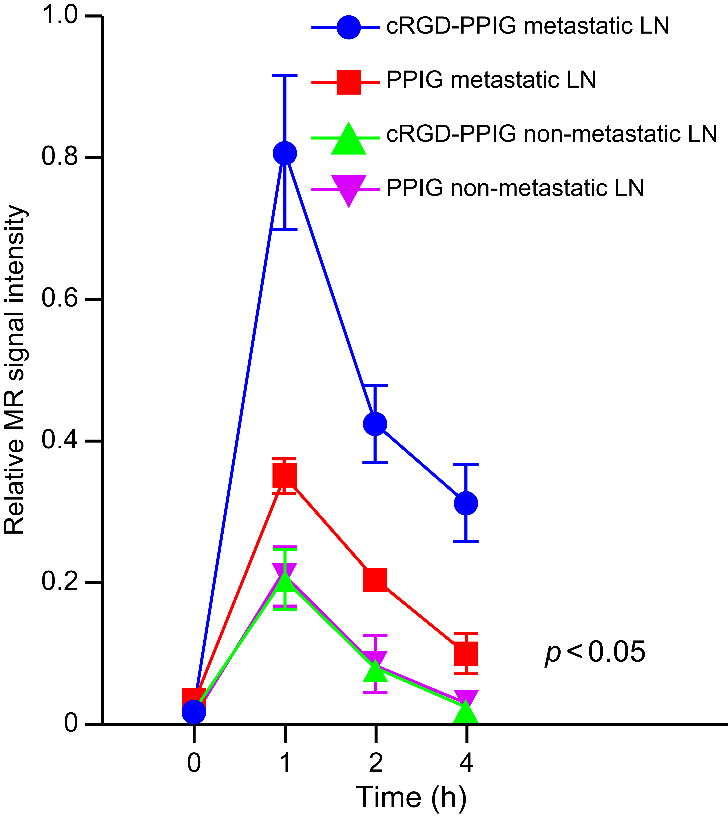


**Supplementary Figure S3**. Average relative T1-weighted MRI signal intensities of the lymph nodes (LNs) over 4 h after injection of cRGD-PPIG or PPIG NPs (general linear model repeated measures) (n = 3)


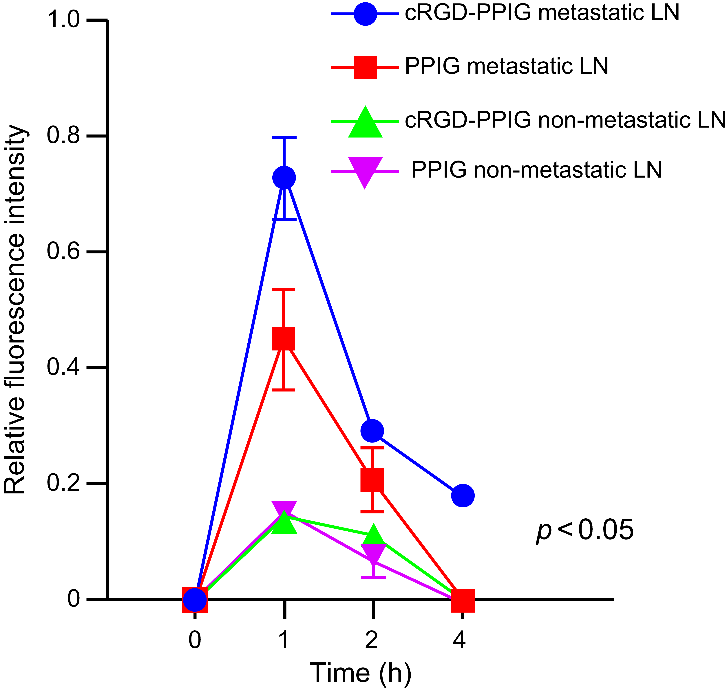


**Supplementary Figure S4**. Average relative fluorescence intensity of lymph nodes (LNs) over 4 h after injection of cRGD-PPIG NPs or PPIG NPs (general linear model repeated measures) (n = 3)


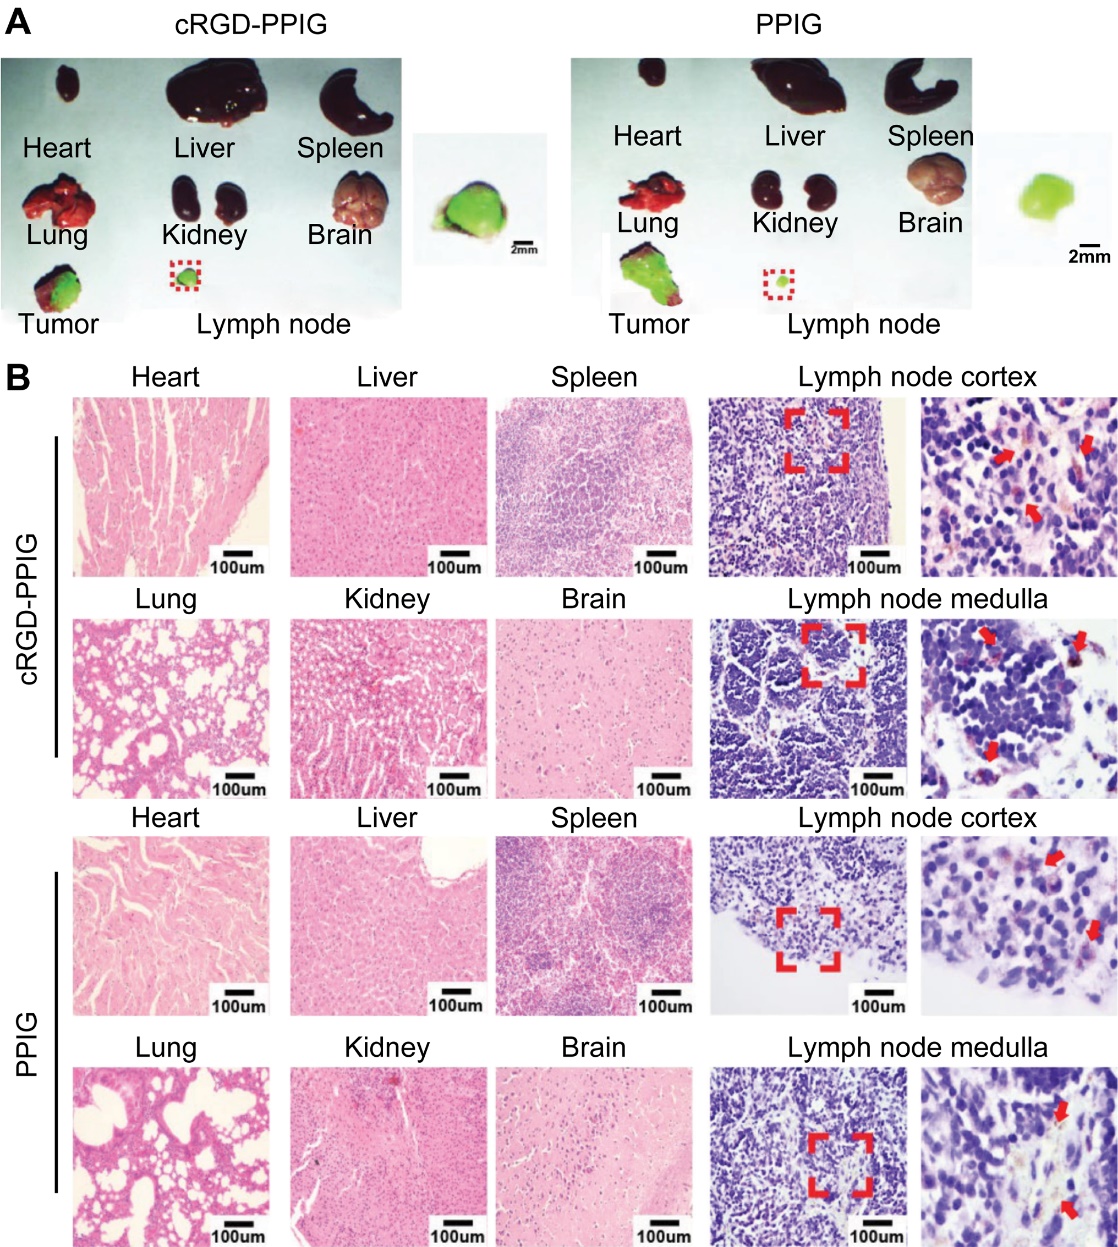


**Supplementary Figure S5**. *In vivo* biodistribution and biosafety of cRGD-PPIG NPs in mice


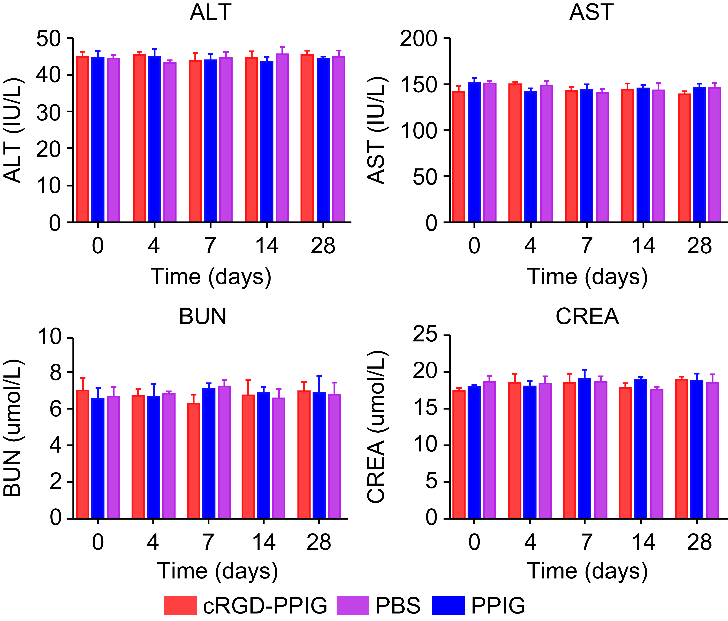


**Supplementary Figure S6**. Blood biochemistry indices, including alanine transaminase (ALT), aspartate transaminase (AST), blood urea nitrogen (BUN), and creatinine (CREA), after footpad injection of PPIG or cRGD-PPIG NPs in rats
